# Supplementary material for: Prophylactic abdominal drainage or no drainage after distal pancreatectomy (PANDORINA): a study protocol of a binational multicenter randomized controlled trial
Source: Springer Nature journal article supplement (doi:10.1186/s13063-022-06736-5), 2022-09-24

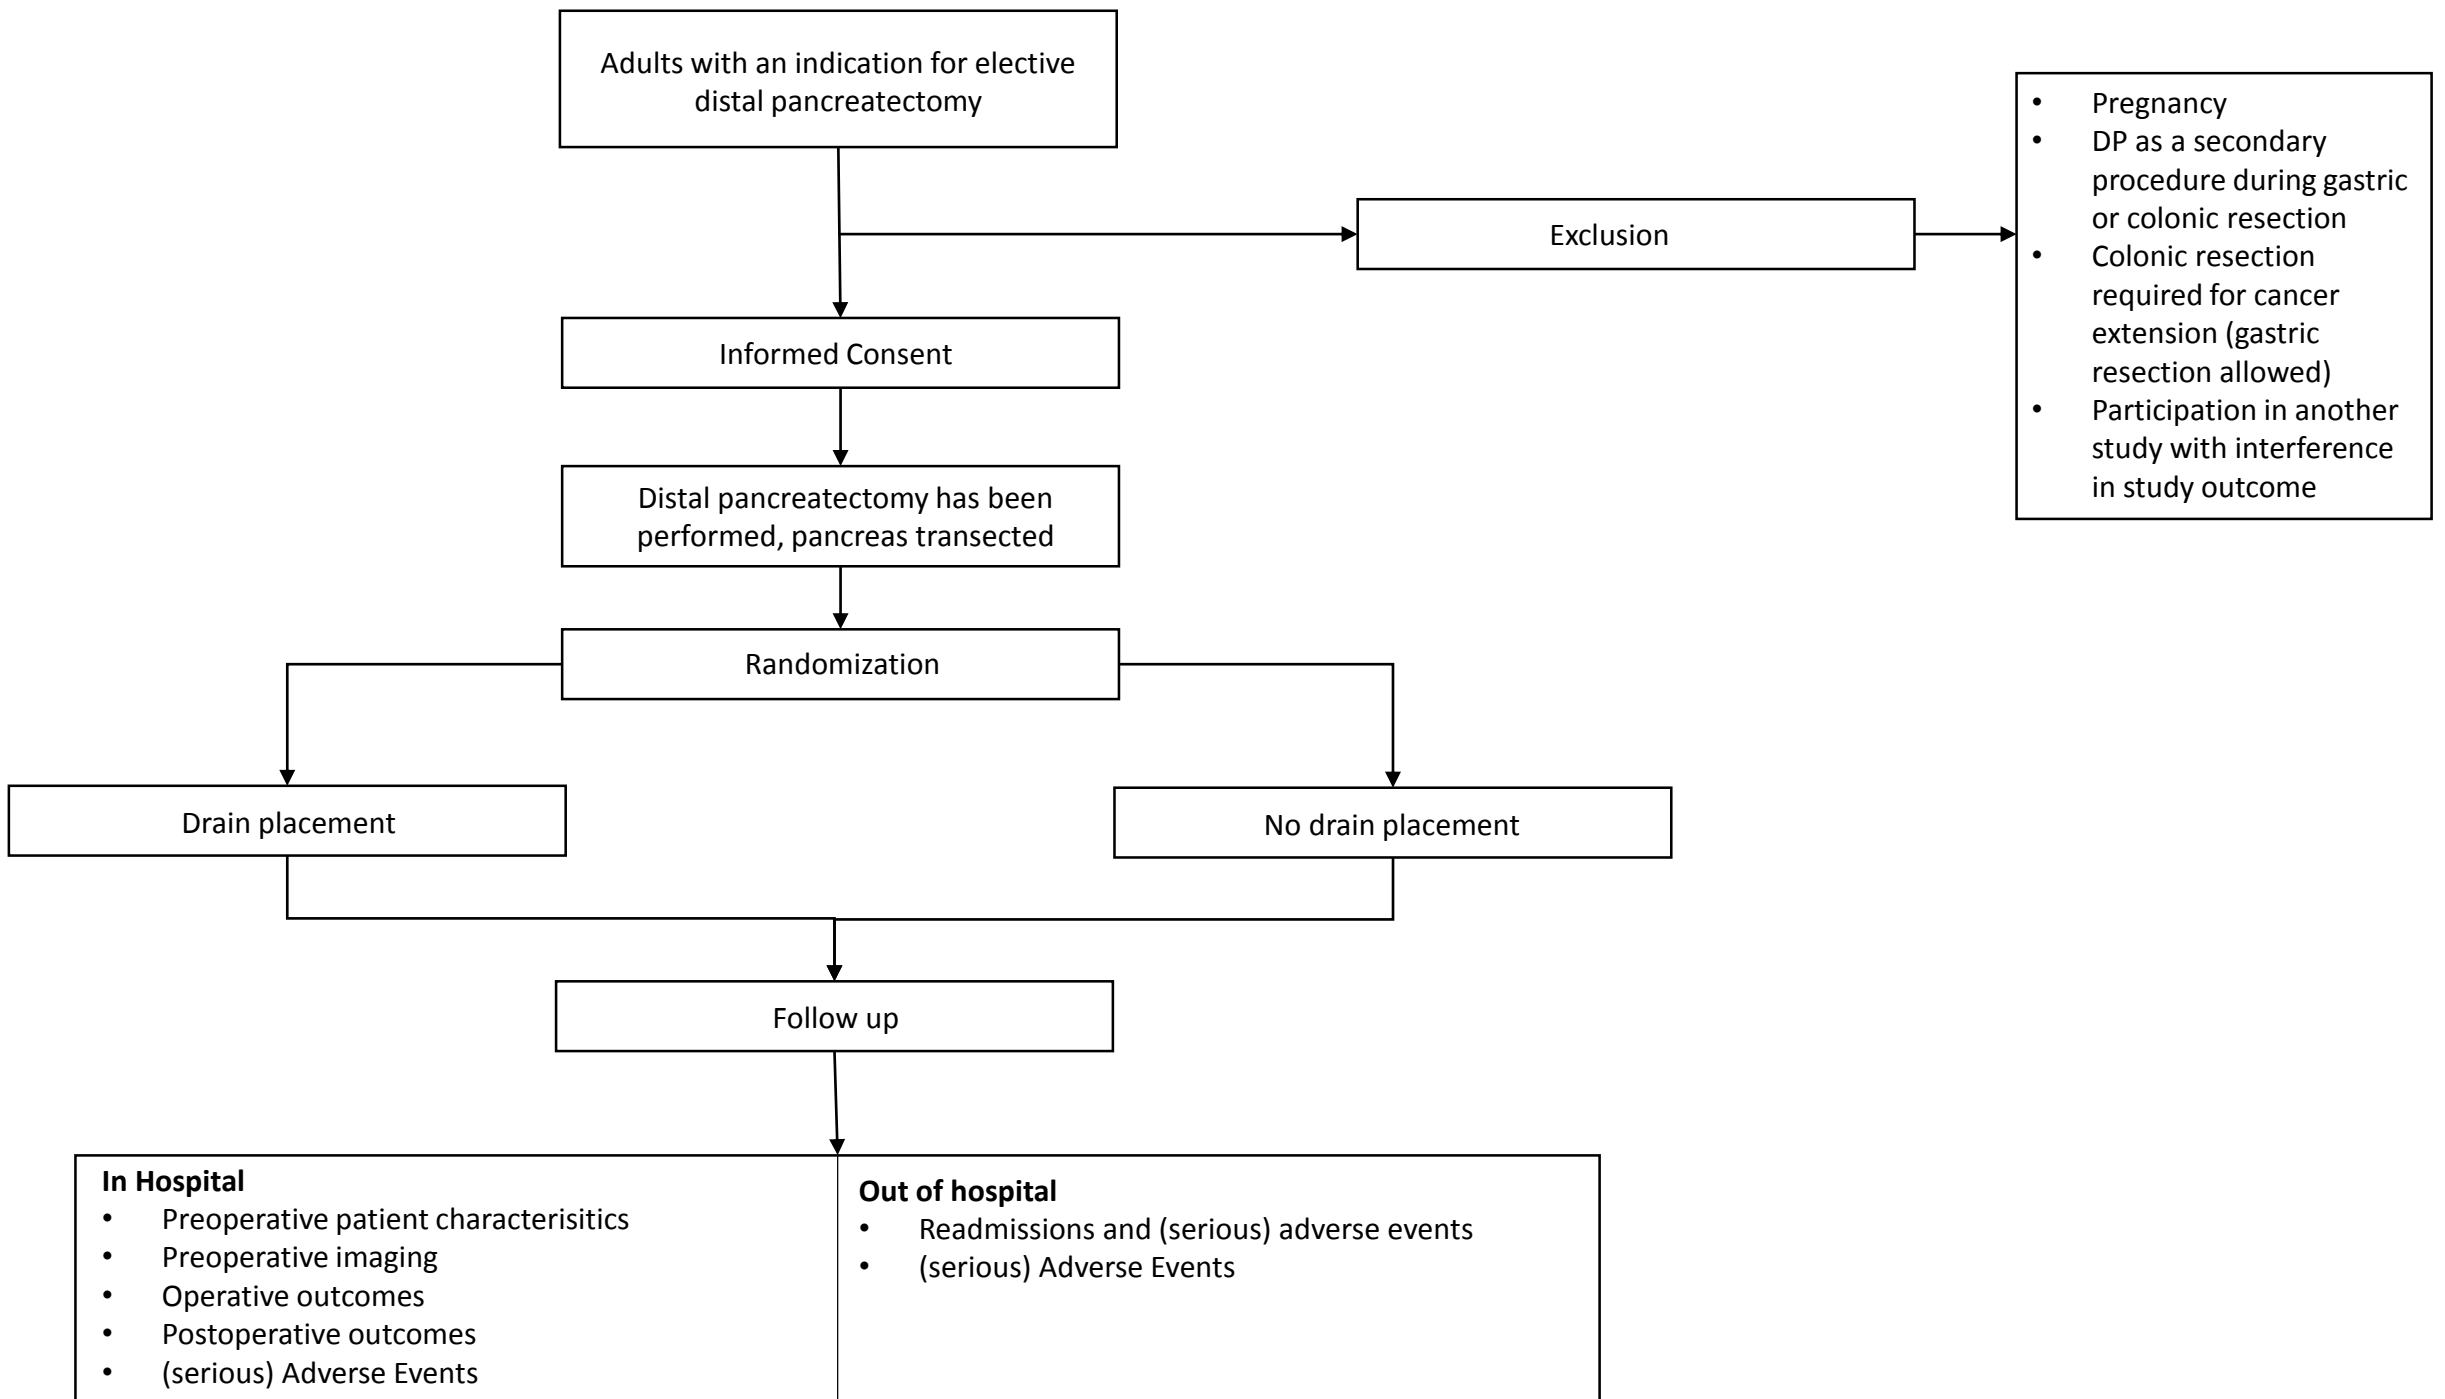

Supplement: MOESM1 [file 23534786]
